# Supplementary material for: Proteomic analyses of human islets reveal potential markers of β cell dysfunction during prediabetes
Source: JCI journal article supplement (doi:10.1172/jci.insight.182135), 2026-03-19
Supplement: sd1 [file 1]

## ELECTRONIC SUPPLEMENTARY MATERIALS

### RESULTS

Tab.S1 Proteins differentially expressed in IGT islets compared to NGT ones.

| GENE                  | PROTEIN NAME                                       | Fold difference | p-value (IGT vs NGT) |
|-----------------------|----------------------------------------------------|-----------------|----------------------|
| <b>DOWN-REGULATED</b> |                                                    |                 |                      |
| ERO1B_HUMAN           | ERO1-like protein beta                             | -1,953844908    | 0,02181316           |
| ACBP_HUMAN            | Acyl-CoA-binding protein                           | -1,702970609    | 0,013691528          |
| K7EJ78_HUMAN          | 40S ribosomal protein S15                          | -1,560678607    | 0,02310156           |
| XRCC5_HUMAN           | X-ray repair cross-complementing protein 5         | -1,547164203    | 0,00978991           |
| RTN1_HUMAN            | Reticulon-1                                        | -1,497253531    | 0,000653076          |
| E9PM92_HUMAN          | Chromosome 11 open reading frame 58                | -1,345711948    | 0,029607711          |
| CREB1_HUMAN           | Cyclic AMP-responsive element-binding protein 1    | -1,292260173    | 0,000472191          |
| S10A6_HUMAN           | Protein S100-A6                                    | -1,276943359    | 0,03883882           |
| LAMB1_HUMAN           | Laminin subunit beta-1                             | -1,20890494     | 0,008559424          |
| SERPH_HUMAN           | Serpin H1                                          | -1,167125471    | 0,012797491          |
| AMD_HUMAN             | Peptidyl-glycine $\alpha$ -amidating monooxygenase | -1,147496275    | 0,035155488          |
| E9PLF1_HUMAN          | Glutathione S-transferase Mu 2                     | -1,141919644    | 0,024770904          |
| SKP1_HUMAN            | S-phase kinase-associated protein 1                | -1,138526642    | 0,032115795          |
| RBM8A_HUMAN           | RNA-binding protein 8A                             | -1,021146535    | 0,000262142          |
| CMGA_HUMAN            | Chromogranin-A                                     | -0,900305985    | 0,018195622          |
| MYH11_HUMAN           | Myosin-11                                          | -0,833387402    | 0,007511186          |
| GORS2_HUMAN           | Golgi reassembly-stacking protein 2                | -0,740330234    | 0,012289888          |
| PURA_HUMAN            | Transcriptional activator protein Pur-alpha        | -0,67948095     | 0,011959482          |
| CALM_HUMAN            | Calmodulin-1                                       | -0,673214077    | 0,004561325          |
| KCY_HUMAN             | UMP-CMP kinase                                     | -0,621369024    | 0,007840769          |
| UBA1_HUMAN            | Ubiquitin-like modifier-activating enzyme 1        | -0,600638412    | 0,041482441          |
| 1433T_HUMAN           | 14-3-3 protein theta                               | -0,588532808    | 0,034623284          |
| IGHG1_HUMAN           | Immunoglobulin heavy constant gamma 1              | -0,579460639    | 0,009075145          |
| HNRPL_HUMAN           | Heterogeneous nuclear ribonucleoprotein L          | -0,576469862    | 0,037886635          |
| Q5JRI1_HUMAN          | Serine/arginine-rich-splicing factor 10            | -0,542519888    | 0,007747543          |
| A0A0B4J1Z1_HUMAN      | Serine/arginine-rich-splicing factor 7             | -0,532427776    | 0,009851968          |
| COPB2_HUMAN           | Coatomer subunit beta                              | -0,52123758     | 0,019968621          |
| JAK2_HUMAN            | Tyrosine-protein kinase JAK2                       | -0,517356548    | 0,00649759           |
| PAK2_HUMAN            | Serine/threonine-protein kinase PAK 2              | -0,5105904      | 0,012087313          |
| C9JZG1_HUMAN          | Eukaryotic translation initiation factor 3 sub.B   | -0,507389815    | 0,011895173          |
| SRSF1_HUMAN           | Serine/arginine-rich splicing factor 1             | -0,495926025    | 0,014324501          |
| FUMH_HUMAN            | Fumarate hydratase, mitochondrial                  | -0,486356509    | 0,024933355          |
| VDAC1_HUMAN           | Voltage-dependent anion-channel protein 1          | -0,477973204    | 0,035530303          |

|                     |                                                    |              |             |
|---------------------|----------------------------------------------------|--------------|-------------|
| PPIA_HUMAN          | Peptidyl-prolyl cis-trans isomerase A              | -0,471334968 | 0,034582023 |
| STAT3_HUMAN         | Signal transducer and activator of transcription 3 | -0,468003541 | 0,022613753 |
| PGK1_HUMAN          | Phosphoglycerate kinase 1                          | -0,406550442 | 0,022776397 |
| F8W726_HUMAN        | Ubiquitin-associated protein 2-like                | -0,405857096 | 0,028686218 |
| ARF1_HUMAN          | ADP-ribosylation factor 1                          | -0,402031906 | 0,045349475 |
| TCPG_HUMAN          | T-complex protein 1                                | -0,392093655 | 0,007642673 |
| IQGA1_HUMAN         | Ras GTPase-activating-like protein                 | -0,371292868 | 0,015370799 |
| ROA3_HUMAN          | Heterogeneous nuclear ribonucleoprotein A3         | -0,35391137  | 0,04782972  |
| B8ZZC5_HUMAN        | Glutaminase kidney isoform, mitochondrial          | -0,34644975  | 0,030085921 |
| G3P_HUMAN           | Glyceraldehyde-3-phosphate dehydrogenase           | -0,316013294 | 0,00674515  |
| A0A075B6N8_HUMAN    | Immunoglobulin heavy constant gamma 3              | -0,298546989 | 0,04439445  |
| PSA3_HUMAN          | Proteasome subunit alpha type-3                    | -0,274085934 | 0,03844112  |
| <b>UP-REGULATED</b> |                                                    |              |             |
| CASPE_HUMAN         | Caspase-14                                         | 1,904031155  | 0,001866081 |
| ERP27_HUMAN         | Endoplasmicreticulumresidentprotein 27             | 1,780125812  | 0,00122635  |
| RRBP1_HUMAN         | Ribosome-bindingprotein 1                          | 1,748101282  | 0,002212965 |
| GATM_HUMAN          | Glycineamidinotransferase, mitochondrial           | 1,695063349  | 0,012673881 |
| CKAP4_HUMAN         | Cytoskeleton-associatedprotein 4                   | 1,601652224  | 0,000166712 |
| CEL2A_HUMAN         | Chymotrypsin-like elastase family member 2A        | 1,57034507   | 0,001435585 |
| PSA5_HUMAN          | Proteasomesubunitalpha type-5                      | 1,568770938  | 0,002894956 |
| KLK1_HUMAN          | Kallikrein-1                                       | 1,46260278   | 0,033345907 |
| LMNB2_HUMAN         | Laminina-2B                                        | 1,436697709  | 0,011778001 |
| E7EX73_HUMAN        | Eukaryotic translation initiation factor 4 gamma 1 | 1,418576715  | 0,00128019  |
| AMYP2A_HUMAN        | Pancreaticalpha-amylase 2A                         | 1,409056286  | 0,00904563  |
| TYB4_HUMAN          | Thymosin beta-4                                    | 1,34902955   | 0,021373347 |
| AMRP_HUMAN          | Alpha-2-macroglobulin receptor-associated p.       | 1,339554413  | 0,043633472 |
| E9PK01_HUMAN        | Elongationfactor 1-delta                           | 1,299495585  | 0,002976972 |
| CEL_HUMAN           | Pancreaticlysophospholipase                        | 1,287121057  | 0,005500881 |
| PLEC_HUMAN          | Plectin                                            | 1,202062102  | 0,003400044 |
| LIPP_HUMAN          | Pancreatictriacylglycerollipase                    | 1,199448203  | 0,000837414 |
| CYB5_HUMAN          | Cytochrome b5                                      | 1,187106901  | 0,023347884 |
| PRDX2_HUMAN         | Peroxiredoxin-2                                    | 1,184190412  | 0,038073248 |
| SE1L1_HUMAN         | Protein sel-1 homolog 1                            | 1,12927077   | 0,006274128 |
| YBOX3_HUMAN         | Y-box-bindingprotein 3                             | 1,070276542  | 0,002278232 |
| PIP_HUMAN           | Prolactininducibleprotein                          | 1,036996633  | 0,025382563 |
| CBPA2_HUMAN         | Carboxypeptidase A2                                | 1,0354361    | 0,004918012 |
| PDIA1_HUMAN         | Proteindisulfide-isomerase                         | 0,998406506  | 0,016945954 |
| AHNK_HUMAN          | Neuroblast differentiation-associated protein      | 0,931159249  | 0,001621318 |
| A0A087X0X3_HUMAN    | Heterogeneous nuclear ribonucleo-protein M         | 0,840340747  | 0,034232627 |
| HNRPF_HUMAN         | Heterogeneous nuclear ribonucleo-protein F         | 0,788528869  | 0,03024182  |
| PPIB_HUMAN          | Peptidyl-prolyl cis-trans isomerase B              | 0,788467472  | 0,005175838 |

|              |                                               |             |             |
|--------------|-----------------------------------------------|-------------|-------------|
| HNRH1_HUMAN  | Heterogeneous nuclear ribonucleo-protein H    | 0,780918986 | 0,001051223 |
| NUDC_HUMAN   | Nuclear migration protein nudC                | 0,780463175 | 0,049601681 |
| VIME_HUMAN   | Vimentin                                      | 0,779292891 | 0,003386928 |
| YBOX1_HUMAN  | Nuclease-sensitive element-binding protein 1  | 0,759930916 | 0,011660268 |
| PDIA4_HUMAN  | Protein disulfide-isomerase A4                | 0,724169464 | 0,002196123 |
| SND1_HUMAN   | Staphylococcal nuclease domain-containing p.1 | 0,701575893 | 0,008457755 |
| CBPA1_HUMAN  | Carboxypeptidase A1                           | 0,696649812 | 0,03164719  |
| IMB1_HUMAN   | Importin subunit beta-1                       | 0,625436604 | 0,006304313 |
| RL13_HUMAN   | 60S ribosomal protein L13                     | 0,622291069 | 0,023502963 |
| SSRD_HUMAN   | Translocon-associated protein subunit delta   | 0,602829149 | 0,018241643 |
| LA_HUMAN     | Lupus La protein                              | 0,599513229 | 0,027820277 |
| PSB6_HUMAN   | Proteasome subunit beta type-6                | 0,594830733 | 0,041606267 |
| C9J9K3_HUMAN | 40S ribosomal protein SA                      | 0,547677265 | 0,047354331 |
| LMNA_HUMAN   | Prelamin A/C                                  | 0,533879772 | 0,027826684 |
| D6R9P3_HUMAN | Heterogeneous nuclear ribonucleoprotein A/B   | 0,528721509 | 0,00880038  |
| ML12A_HUMAN  | Myosin regulatory light chain 12A             | 0,492587215 | 0,02228934  |
| HSP7C_HUMAN  | Heat shock cognate 71 kDa protein             | 0,4505999   | 0,031801407 |
| ENPL_HUMAN   | Endoplasmic reticulum protein                 | 0,408208039 | 0,009900778 |
| LMNB1_HUMAN  | Laminin 1B                                    | 0,398168213 | 0,036108575 |
| HNRPU_HUMAN  | Heterogeneous nuclear ribonucleoprotein U     | 0,377333781 | 0,029525001 |
| AKA12_HUMAN  | A-kinase anchor protein 12                    | 0,367448186 | 0,044701593 |
| SAHH_HUMAN   | Adenosylhomocysteinase                        | 0,346076082 | 0,043634514 |
| CDC37_HUMAN  | Hsp90 co-chaperone Cdc37                      | 0,250956359 | 0,031565371 |

NGT: normal glucose tolerant subjects, IGT: impaired glucose tolerant subjects, p interaction between groups <0.05

**Tab.S2 Correlations between HOMA-%beta and selected proteins.**

|                 | <b>HOMA-%beta</b> |               |          |
|-----------------|-------------------|---------------|----------|
| <b>Proteins</b> | <b>Pearson r</b>  | <b>95% CI</b> | <b>P</b> |
| <b>14-3-3 T</b> | 0.75              | 0.32 to 0.92  | 0.004    |
| <b>SEL1L</b>    | -0.81             | -0.92 to 0.35 | 0.005    |
| <b>PDIA1</b>    | -0.51             | -0.84 to 0.18 | 0.04     |
| <b>PAK2</b>     | 0.75              | 0.21 to 0.93  | 0.02     |
| <b>CEL2A</b>    | -0.53             | -0.85 to 0.13 | 0.04     |

**Tab.S3 Correlations between Disposition index and selected proteins**

|                 | <b>Disposition index</b> |                  |          |
|-----------------|--------------------------|------------------|----------|
| <b>Proteins</b> | <b>Pearson r</b>         | <b>95% CI</b>    | <b>P</b> |
| <b>FUMH</b>     | 0.58                     | 0.01 to 0.86     | 0.04     |
| <b>ERO1B</b>    | 0.58                     | 0.02 to 0.87     | 0.04     |
| <b>CASPE</b>    | -0.64                    | - 0.88 to - 0.10 | 0.02     |
| <b>PAK2</b>     | 0.68                     | 0.29 to 0.91     | 0.03     |
| <b>CREB1</b>    | 0.58                     | 0.02 to 0.87     | 0.04     |
| <b>ARF1</b>     | 0.60                     | 0.05 to 0.88     | 0.03     |
| <b>SEL1L</b>    | -0.71                    | -0.92 to 0.23    | 0.01     |

**Figure S1. Gene ontology (GO) enrichment for differential genes between islets from subjects with high beta cells glucose sensitivity (representing in black bar) and islets from subjects with low beta cells glucose sensitivity (representing in grey bar).** Categories were determined based on information provided by the online PANTHER classification system resource. All proteins were grouped based on biological process (panel A); molecular function (panel B); pathways analysis (panel C). Data are expressed as number of genes coding for the proteins identified in each group.

**Fig.S1**

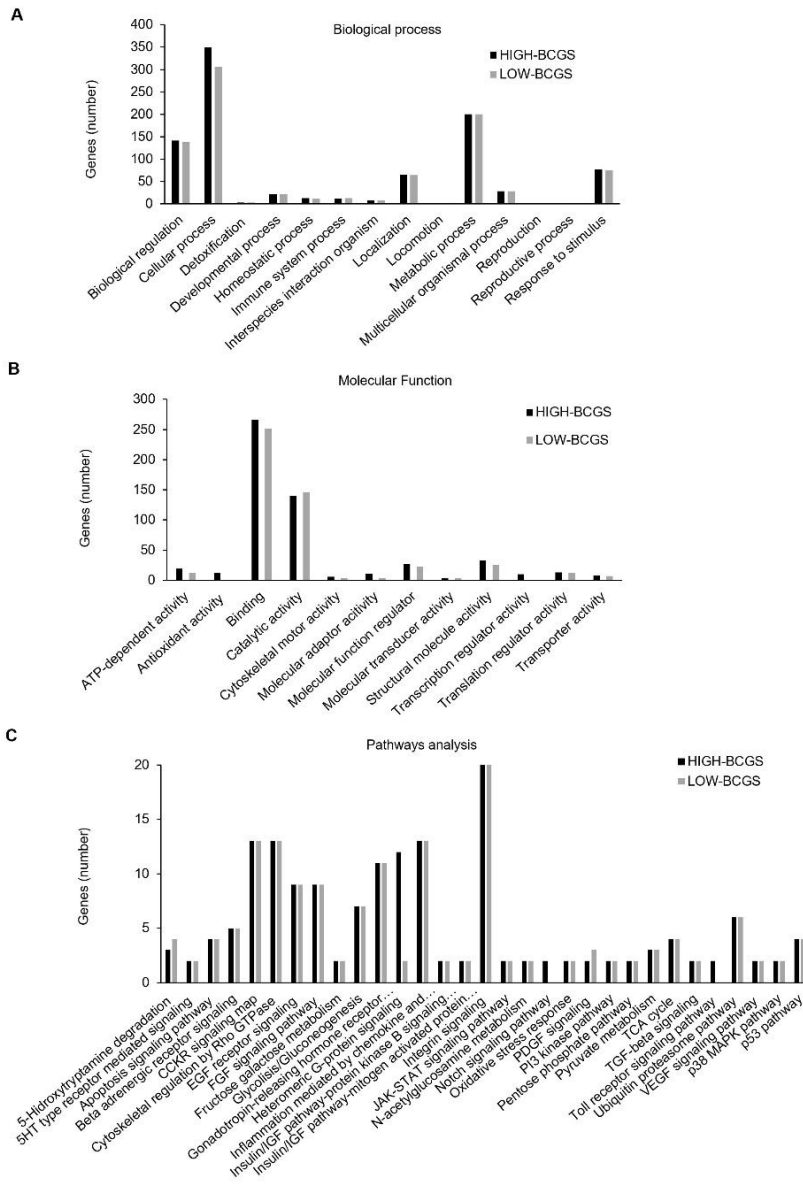

**Fig.S2 Differentially expressed proteins in IGT islets (black boxes) compared to NGT islets (grey boxes) after correcting for the expression of carboxypeptidase A1.** Proteins involved in the major detected molecular pathways are grouped according to their function: glucose metabolism (panel A), lipid metabolism (panel B), intracellular signaling pathways (panel C) insulin secretion and release (panel D); or apoptosis and proliferation (panel E). \*\*\* $p < 0.001$ ; \*\* $p < 0.01$ ; \* $p < 0.05$ ; IGT: impaired glucose tolerant (n=5); NGT: normal glucose tolerant (n=7).

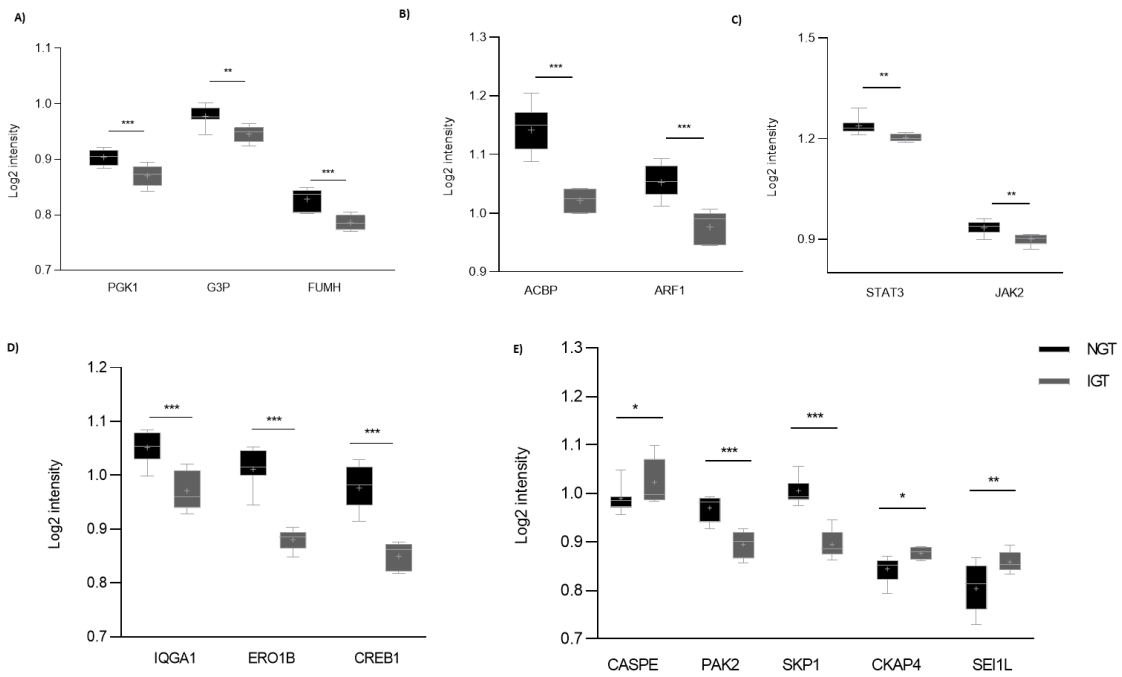

## **METHODS**

### **Subjects and metabolic studies**

Subjects, aged 18-75 years, without history of diabetes mellitus, candidates for pylorus-preserving pancreatoduodenectomy for extra-pancreatic tumors were recruited at the Digestive Surgery Unit and studied at the Centre for Endocrine and Metabolic Diseases unit (Agostino Gemelli University Hospital, Rome, Italy). The study protocol (ClinicalTrials.gov registration no. NCT02175459) was approved by the local ethics committee (P/656/CE2010 and 22573/14) (Rome, Italy) and all participants provided written informed consent prior any study procedure. In the preliminary visit, all participants underwent an anthropometric assessment (weight, BMI, waist and hips circumferences), pharmacological and pathological anamnesis was performed to note any current or previous therapies and comorbidities. Altered serum lipase and amylase levels prior to surgery, as well as morphologic criteria for pancreatitis, were considered exclusion criteria. Patients with severe obesity (BMI > 40), uncontrolled hypertension and/or diabetes (with HbA1c  $\geq$  58 mmol/mol (7.5%) and/or hypercholesterolemia were also excluded. Only patients with normal cardiopulmonary and renal function ascertained by medical history, physical examination, blood chemistry, electrocardiogram and urine analysis were subjected to a pre-surgery metabolic evaluation as follows:

**1-Oral glucose tolerance test (OGTT).** A standard 75 g oral glucose tolerance test was performed with measurement of glucose, insulin and C-peptide at 0, 30, 60, 90, 120 min after glucose load. Based on the pre-surgery OGTT results, we classified the patients according to the ADA classification (American Diabetes Association, 2019): subjects whose 2 h post glucose load was below 7.8 mmol/l were defined as normal glucose tolerant, subjects whose 2 h post glucose load was 7.8–10.9 mmol/l were defined as impaired glucose tolerant [1].

**2-Euglycemic Hyperinsulinemic clamp** for the evaluation of insulin sensitivity has been done after night fasting. During the test a fixed amount of insulin is infused (Actrapid HM, 40 mIU / m<sup>2</sup> per min; Novo Nordisk, Copenhagen, Denmark) and at the same time a variable infusion of 20% glucose is started through an infusion pump. The glucose infusion rate is regulated on the basis of the glucose measured by capillary samples submitted every 5 minutes to maintain euglycemia with maximum variations of  $\pm$  5% with respect to the fasting glucose. The use of glucose is calculated during the last phase (30 min) of the clamp and is measured as an M value, i.e. mg of glucose metabolized per kg of body weight per minute.

**3-Mixed Meal test.** MMT was performed as previously described [17] (1-2). Patients were instructed to eat a meal of 830 kcal (107 kcal of protein, 353 kcal of fat and 360 kcal of carbohydrates) in 15 minutes. Blood samples were taken on an empty stomach and at 30 minutes intervals in the following 240 minutes (sampling time 0', 30', 60', 90', 120', 150', 180', 210' and 240') for measuring plasma concentrations of glucose, insulin, peptide C. Insulin levels were determined using a commercial RIA kit (Medical System, Immulite DPC, Los Angeles, CA). Plasma glucose concentrations were determined by the glucose oxidase technique, using a glucose analyser (Beckman Instruments, Palo Alto, CA, USA). Plasma C-peptide was measured by auto DELPHIA automatic fluoroimmunoassay (Wallac, Turku, Finland), with a detection limit of 17 pmol/L.

**Calculations.** During OGTT and MMT insulin secretion was derived from C-peptide levels by deconvolution. An estimate of the  $\beta$  cell function (defined as  $\beta$ -Cell Glucose Sensitivity) was obtained as an increase, compared to the basal value, of insulin secretion during the last 20 min of the test, divided by the corresponding increase in blood glucose as previously described [2]. Rate sensitivity, also estimated from OGTT modeling, is a  $\beta$  cell–functional parameter that represents the dependence of the ISR on the rate of change in glucose concentration and is related to early insulin release. Matsuda indexes [3] were calculated as indexes of whole-body insulin sensitivity based on insulin and glucose values obtained from the OGTT.

All metabolic evaluations were performed about a week before surgery and after a variable recovery period (assessed by the normalization of the inflammation indexes, weight stabilization, and absence of abnormal intestinal motility and deficiency of the exocrine pancreas symptoms) but before the start of any adjuvant antineoplastic treatment (chemotherapy or radiotherapy).

### **Surgical procedures**

Indications for surgery were: periampullary tumors, pancreatic intraductal papillary tumors, mucinous cystic neoplasm of the pancreas, non-functional pancreatic neuroendocrine tumors. Pancreatoduodenectomy was performed according to the pylorus preserving technique. Briefly, the

pancreatic head, the entire duodenum, common bile duct, and gallbladder were removed en-bloc, leaving a functioning pylorus intact at the gastric outlet. All adjacent lymph nodes were carefully removed. The continuity of the gastrointestinal tract was restored by an end-to-side pancreatojejunostomy. Further downstream, an end-to-side hepaticojejunostomy and an end-to-side pylorojejunostomy were performed. The volume of pancreas removed during the surgery is constant (~50%), as previously reported by Schrader et al.[4]. This procedure guarantees repeatability of the model adopted and the possibility to compare samples from different subjects. A pancreatic sample was collected during the surgery, from the downstream edge of the surgical cut. Pancreas samples were frozen in liquid nitrogen and then stored at -80 until analysis.

### **Samples procession**

Pancreatic tissue samples extracted during the surgery at A. Gemelli Hospital were placed in cryomolds, then included in OCT and quickly frozen in liquid nitrogen and stored - 80 ° C until sectioned, which took place at the Islet regeneration department at the Joslin Diabetes Center, Harvard Medical School (Boston-USA). The 8 µm sections were made using a cryostat at -20 °, then sections were fixed on slides at room temperature. We thus obtained about 40 slides per subject in study.

Subsequently, to avoid any contamination or chemical and physic stress on samples, the LCM (laser capture microdissection) was carried out on these sections for the islets' isolation as previously described in a methodological work [5]. To have sufficient material for mass spectrometry analysis, approximately 200 islets with similar size were collected per subject. The micro-dissected cells were therefore incubated with 15 µl of an elution / digestion buffer consisting of 8 mM NH<sub>4</sub>HCO<sub>3</sub>; 10 mM DTT; 50 Mm Trypsin pH 8 for 15 minutes at 37 ° C for protein digestion. The digestion was stopped by 0.1% TFA. All peptide samples were dried down in Speed Vac remove TFE, and resuspended in 20 mM NH<sub>4</sub>HCO<sub>3</sub> for LC-MS/MS analysis.

### **Proteomic analysis**

The proteomics analysis was performed at the Pacific Northwest laboratories of Richland (WA). The use of the high-performance liquid chromatography-mass spectrometry (HPLC-MS) technique guarantees the identification of multiple peptide's sequences recognizable with high confidence in complex samples and the comparison of different samples with a similar protein profile.

**LC-MS/MS analyses** were performed on a custom-built automated LC system coupled on-line to an LTQ-Orbitrap mass spectrometer (Thermo Scientific, San Jose, CA) via a nano-electrospray ionization interface as previously described [6]. Briefly, 0.75 µg of peptides were loaded onto long reversed-phase capillary columns with 75-µm-inner diameter packed using 3 µm Jupiter C18 particles (Phenomenex, Torrance, CA). The mobile phase was held at 100% A (0.1% formic acid) for 20 min, followed by a linear gradient from 0 to 60% buffer B (0.1% formic acid in 90% acetonitrile) over 85 min. The instrument was operated in data-dependent mode with an m/z range of 400–2000, in which a full MS scan with a resolution of 100K was followed by 6 MS/MS scans. The 6 most intensive precursor ions were dynamically selected in the order of highest intensity to lowest intensity and subjected to collision-induced dissociation using a normalized collision energy setting of 35% and a dynamic exclusion duration of 1 min. The heated capillary was maintained at 200 °C, while the ESI voltage was kept at 2.2 kV.

**LC-MS/MS raw data** were converted into data files using Extract\_MSn (version 3.0) in Bioworks Cluster 3.2 (Thermo Fisher Scientific, Cambridge, MA). MS Generating-Function (MSGF) scores were generated for each identified spectrum as described previously by computing rigorous p-values [7]. Fully tryptic peptides with MSGF score <5E-10 and mass measurement errors <3 ppm were accepted as identifications. All peptides that passed the filtering criteria were input into the Protein Prophet program [8] to generate a final non-redundant list of proteins. Label-free MS intensity-based quantification was performed using the accurate mass and time (AMT) tag approach as previously described [9]. The analysis of the raw data was performed through a client-server application (Proteome Discovered version 2.0 produced by Thermo Fisher) able to identify different proteins by comparing the mass spectra of the digested fragments with the information contained in a selected FASTA database. Through the UniProt service, which collects information from the most used Swiss-prot, TrEMBL and PIR databases [10], we clarified the function and characteristics of each protein. Then using PANTHER classification software (Protein Analysis Through Evolutionary Relationships) it was possible to classify the proteins (and their coding genes) expressed in each single group under study based on their biological functions and molecular function [11].

**Tab. S4 List of Antibodies with Corresponding Dilutions and Antigen Retrieval Buffers**

| Order | Antibody | Supplier   | Clone      | Catalog    | Dilution Factor | Opal Pairing | Retrival and Incubation Time |
|-------|----------|------------|------------|------------|-----------------|--------------|------------------------------|
| 1     | IQ-GAP1  | Abcam      | [EPR5220]  | 133490     | 1:100           | 520          | ER1 30'                      |
| 2     | SEL1L    | Invitrogen | polyclonal | PA5-88333  | 1:300           | 690          | ER1 40'                      |
| 3     | GLUCAGON | Santa Cruz | (C11)      | sc-514592  | 1:500           | 570          | ER1 30'                      |
| 4     | INSULIN  | Invitrogen | polyclonal | PA5-120784 | 1:600           | 480          | ER1 30'                      |

**Bibliography:**

1. American Diabetes, A., *2. Classification and Diagnosis of Diabetes: Standards of Medical Care in Diabetes-2019*. Diabetes Care, 2019. **42**(Suppl 1): p. S13-S28.
2. Mezza, T., et al., *Pancreaticoduodenectomy model demonstrates a fundamental role of dysfunctional beta cells in predicting diabetes*. J Clin Invest, 2021. **131**(12).
3. Matsuda, M. and R.A. DeFronzo, *Insulin sensitivity indices obtained from oral glucose tolerance testing: comparison with the euglycemic insulin clamp*. Diabetes Care, 1999. **22**(9): p. 1462-70.
4. Menge, B.A., et al., *Metabolic consequences of a 50% partial pancreatectomy in humans*. Diabetologia, 2009. **52**(2): p. 306-17.
5. Cefalo, C.M.A., et al., *A Systematic Comparison of Protocols for Recovery of High-Quality RNA from Human Islets Extracted by Laser Capture Microdissection*. Biomolecules, 2021. **11**(5).
6. Zhou, J.Y., et al., *Improved LC-MS/MS spectral counting statistics by recovering low-scoring spectra matched to confidently identified peptide sequences*. J Proteome Res, 2010. **9**(11): p. 5698-704.
7. Kim, S., N. Gupta, and P.A. Pevzner, *Spectral probabilities and generating functions of tandem mass spectra: a strike against decoy databases*. J Proteome Res, 2008. **7**(8): p. 3354-63.
8. Nesvizhskii, A.I., et al., *A statistical model for identifying proteins by tandem mass spectrometry*. Anal Chem, 2003. **75**(17): p. 4646-58.
9. Qian, W.J., et al., *Large-scale multiplexed quantitative discovery proteomics enabled by the use of an (18)O-labeled "universal" reference sample*. J Proteome Res, 2009. **8**(1): p. 290-9.
10. UniProt, C., *UniProt: the Universal Protein Knowledgebase in 2023*. Nucleic Acids Res, 2023. **51**(D1): p. D523-D531.
11. Thomas, P.D., et al., *PANTHER: Making genome-scale phylogenetics accessible to all*. Protein Sci, 2022. **31**(1): p. 8-22.
